# Supplementary material for: Ionic liquid C16mimBF4assisted synthesis of poly(benzoxazine-co-resol)-based hierarchically porous carbons with superior performance in supercapacitors
Source: Royal Society of Chemistry journal article supplement (doi:10.1039/c2ee23127a), 2012-11-28
Supplement: c2ee23127a.pdf [file c2ee23127a.pdf]

## Electronic Supporting Information

# Ionic liquid $C_{16}mimBF_4$ assisted synthesis of poly(benzoxazine-co-resol)-based hierarchical porous carbons with superior performance in supercapacitors

De-Cai Guo, Juan Mi, Guang-Ping Hao, Wei Dong, Guang Xiong, Wen-Cui Li, and An-Hui Lu \*

State Key Laboratory of Fine Chemicals, School of Chemical Engineering, Dalian University of Technology, Dalian 116024, P.R. China

\*E-mail: anhuilu@dlut.edu.cn, Tel/Fax: +86-411-84986112

Table S1 Relative surface concentrations of carbon species obtained by fitting the C1s core level XPS spectra

| Sample | I<br>284.6 eV<br>(C-C) | II<br>286.2 eV<br>(C-OH&C-N) | III<br>288.2 eV<br>(C=O) | IV<br>289.6 eV<br>(COOH) | V<br>291.2 eV<br>(carbonate) |
|--------|------------------------|------------------------------|--------------------------|--------------------------|------------------------------|
| CN     | 0.68                   | 0.16                         | 0.08                     | 0.06                     | 0.02                         |
| CNB-1  | 0.70                   | 0.18                         | 0.05                     | 0.04                     | 0.03                         |
| CNB-2  | 0.53                   | 0.38                         | 0.06                     | 0.03                     |                              |
| CNB-3  | 0.68                   | 0.24                         | 0.08(288.92eV)           |                          |                              |
| CNB-4  | 0.61                   | 0.30                         | 0.06                     | 0.03                     |                              |

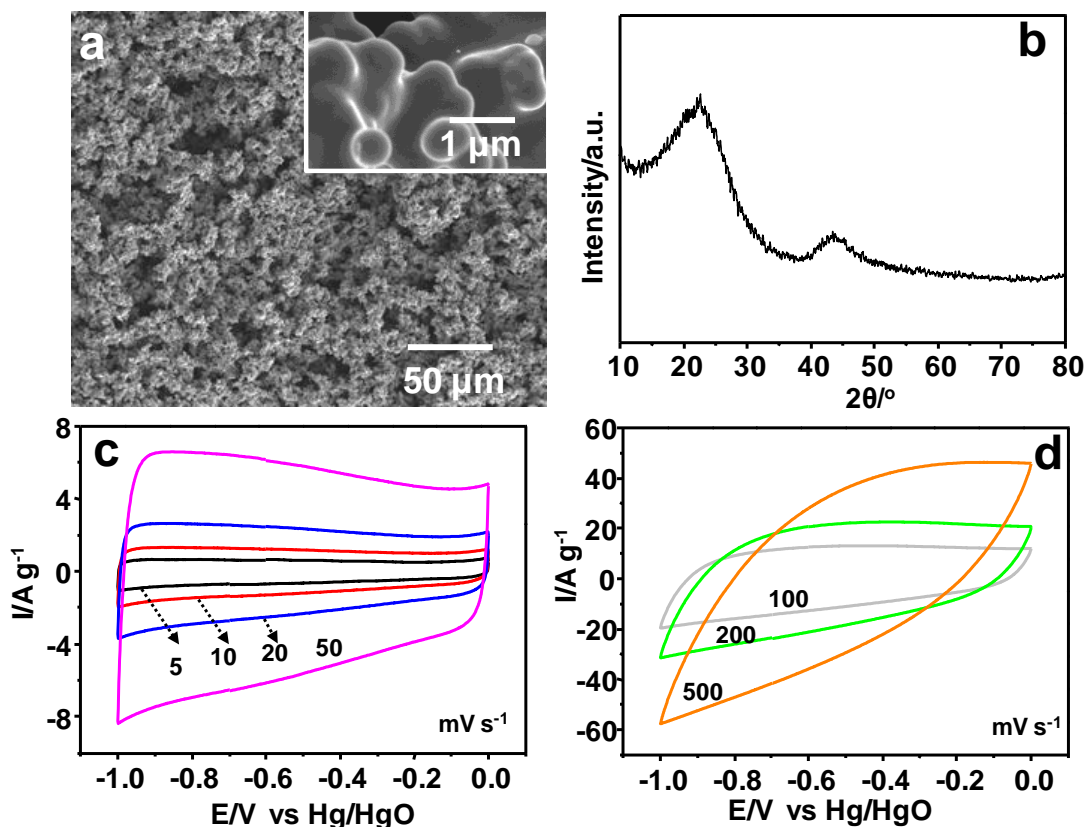

Fig. S1 SEM image of CN(a), and the XRD pattern(b). The rate capability of CN tested in a three electrode system at different scan rates (Fig. S1 c,d).

From the Fig.S1 a, we can see the sponge-like carbon framework of CN, similar with that of CNB-n (n=1 ~ 4). As seen from the inset image, the carbon framework of CN lacks of big mesopores and macropores with sizes ranging from 10 to 200 nm (see Fig 2). As shown in Fig.S1 b, the XRD pattern of sample CN also exhibits some level of graphitic structure. When using CN as the electrode, it can maintain similar rectangular shape at low scan rates (5 to 50 mV s<sup>-1</sup>). In contrast, at high scan rates of 100 to 500 mV s<sup>-1</sup>(Fig S1 c,d), the CV curves deviates from rectangular shape. And the specific capacitance of 182 F g<sup>-1</sup> rapidly drops to 103 F g<sup>-1</sup> corresponding with the current density increases from 0.5 A g<sup>-1</sup> to 20 A g<sup>-1</sup>. Such rate capability of CN is attributed to the lack of both the big pores which facilitate electrolyte transmission and heteroatoms doped carbon surfaces which increase the wettability of the surface and electrolyte, as compared with sample CNB-3.

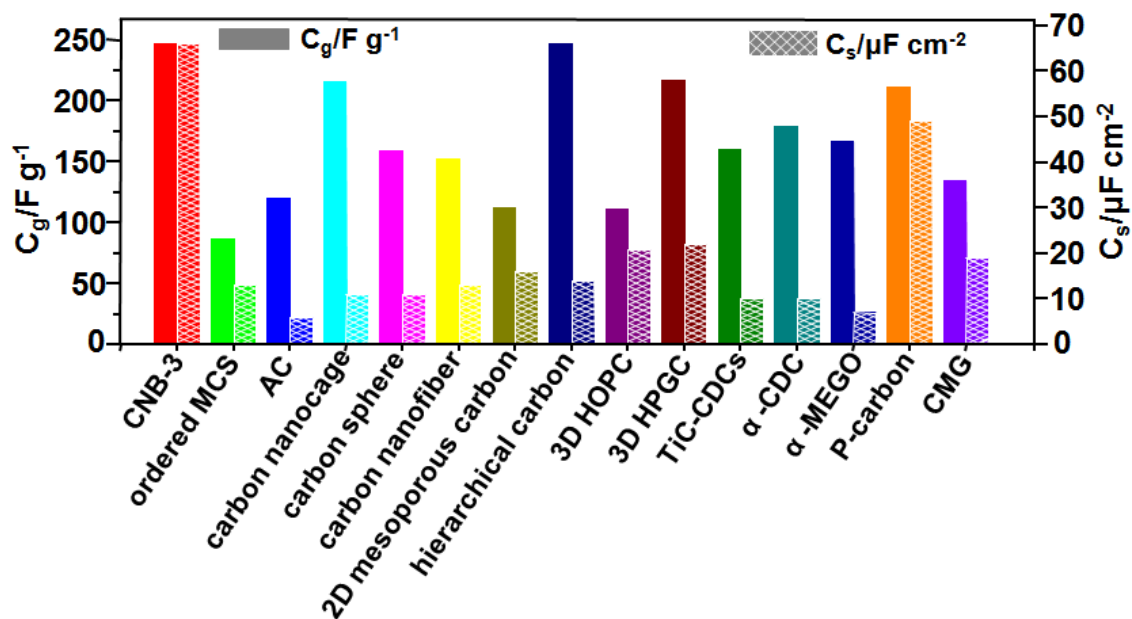

**Fig. S2** The gravimetric and volumetric capacitance of CNB-3 in this work compared with that of other carbonaceous materials including: ordered mesoporous carbon sphere (ordered MCS),<sup>1</sup> active carbon (AC),<sup>1</sup> carbon nanocage,<sup>2</sup> mesoporous carbon sphere,<sup>3</sup> carbon nanofiber arrays,<sup>4</sup> 2D ordered mesoporous carbon,<sup>5</sup> hierarchical porous carbon,<sup>6</sup> 3D hierarchically ordered porous carbon(3D HOPC),<sup>7</sup> 3D aperiodic hierarchical porous graphitic carbon (3D HPGC),<sup>8</sup> carbide-derived carbon (TiC-CDCs),<sup>9</sup> Chemical activation of CDC,<sup>10</sup> activated microwave exfoliated GO by KOH ( $\alpha$ -MEGO),<sup>11</sup> phosphorus-enriched carbon (P-carbon),<sup>12</sup> chemically modified graphene (CMG).<sup>13</sup> The detailed experimental conditions of the samples used for comparison are listed in Table S2.

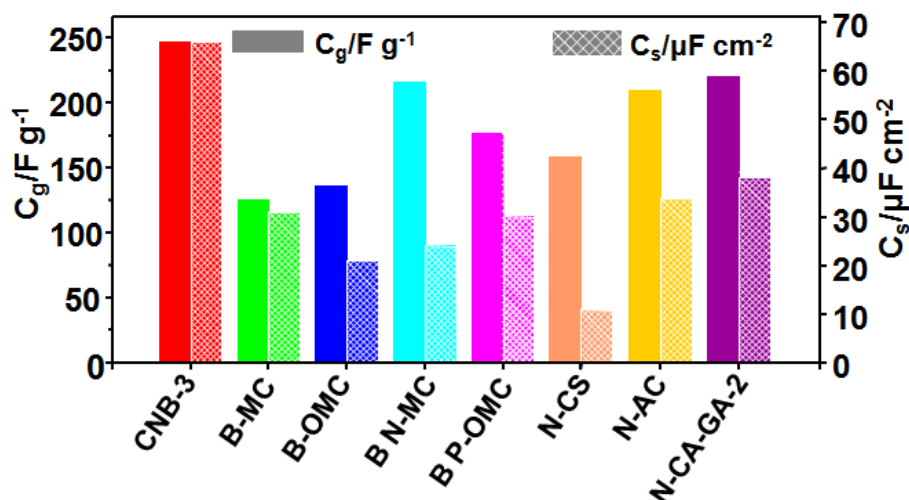

**Fig. S3** The gravimetric and volumetric capacitance of CNB-3 compared with that of B or N doped carbonaceous materials including B-doped mesoporous carbon (B-MC),<sup>14</sup> B-doped ordered mesoporous carbon (B-OMC),<sup>5</sup> boron and nitrogen co-doped porous carbon (B-, N-MC),<sup>15</sup> B, P modified ordered mesoporous carbon (B-, P-OMC),<sup>16</sup> N-containing carbon spheres (N-CS),<sup>3</sup> N-microporous activated carbon (N-AC),<sup>17</sup> N-containing hydrothermal carbon (N-CA-GA-2).<sup>18</sup> The detailed experimental conditions of the samples used for comparison are listed in Table S3.

Table S2 Typical results of nanocarbon and carbon-containing composite materials for supercapacitors in literatures

| Sample                                                       | Gravimetric capacitance (F g <sup>-1</sup> ) | Interfacial capacitance (μF cm <sup>-2</sup> ) | Volumetric capacitance (F cm <sup>-3</sup> ) | System voltage(V) | Scan rate              | Electrolyte                                                            | System <sup>a</sup> | Ref. |
|--------------------------------------------------------------|----------------------------------------------|------------------------------------------------|----------------------------------------------|-------------------|------------------------|------------------------------------------------------------------------|---------------------|------|
| our sample (CNB-3)                                           | 247                                          | 66                                             | 101                                          | -1 - 0.           | 0.5 A g <sup>-1</sup>  | 6 M KOH                                                                | 3/GC                | -    |
| mesoporous carbon sphere arrays (MCSA)                       | 83                                           | 14                                             | -                                            | 0 - 3             | 5 mV s <sup>-1</sup>   | 1 M (C <sub>2</sub> H <sub>5</sub> ) <sub>4</sub> NBF <sub>4</sub> /PC | 2/CV                | 1    |
| AC                                                           | 127                                          | 6                                              | -                                            | 0 - 3             | 5 mV s <sup>-1</sup>   | 1 M (C <sub>2</sub> H <sub>5</sub> ) <sub>4</sub> NBF <sub>4</sub> /PC | 2/CV                | 1    |
| carbon nano-cages (CNCs-700)                                 | 214                                          | 11*                                            | -                                            | 0 - 0.8           | 1 A g <sup>-1</sup>    | 1 M H <sub>2</sub> SO <sub>4</sub>                                     | 3/GC                | 2    |
| mesoporous carbon spheres (MCS)                              | 159                                          | 11*                                            | -                                            | 0 - 2.5           | 0.5 A g <sup>-1</sup>  | 1 M LiPF <sub>6</sub> in EC/DMC (EC:DMC =1)                            | 3/GC                | 3    |
| carbon nanofiber arrays (MCNAs)                              | 152                                          | 13                                             | -                                            | 0 - 3             | 200 mV s <sup>-1</sup> | 1 M (C <sub>2</sub> H <sub>5</sub> ) <sub>4</sub> NBF <sub>4</sub> /PC | 2/CV                | 4    |
| heteroatom-incorporated 2D ordered mesoporous carbons (OMCs) | 112*                                         | 16                                             | -                                            | 0 - 0.8           | 0.2 A g <sup>-1</sup>  | 6 M KOH                                                                | 3/GC                | 5    |
| hierarchical porous carbon (HPC)                             | 247                                          | 14*                                            | -                                            | -1 - 0.2          | 5 mV s <sup>-1</sup>   | 6 M KOH                                                                | 3/CV                | 6    |

|                                                                   |     |     |     |         |                       |                                                                 |      |    |
|-------------------------------------------------------------------|-----|-----|-----|---------|-----------------------|-----------------------------------------------------------------|------|----|
| 3D, hierarchically ordered, porous carbons(HOPC-800)              | 109 | 20  | -   | 0 - 1   | 1 A g <sup>-1</sup>   | No record                                                       | 3/CV | 7  |
| 3D aperiodic hierarchical porous graphitic carbon (HPGC)          | 217 | 22* | -   | 0 - 1   | 0.5 A g <sup>-1</sup> | 6 M KOH                                                         | 3/GC | 8  |
| TiC-CDCs carbide derived carbon (CDC)                             | 160 | 10  | 85  | 0 - 3   | 20 mV s <sup>-1</sup> | 1-Ethyl-3-methylimidazolium bis(trifluoromethanesulfonyl)       | 2/CV | 9  |
| chemical activation of CDC                                        | 179 | 10* | 118 | 0 - 2.3 | 20 mA g <sup>-1</sup> | NEt <sub>4</sub> BF <sub>4</sub> salt dissolved in acetonitrile | GC   | 10 |
| microwave exfoliated GO (MEGO) and activated MEGO (a-MEGO) by KOH | 165 | 7*  | 60  | 0 - 3.5 | 1.4 A g <sup>-1</sup> | 1-butyl-3-methyl-imidazolium tetrafluoroborate /AN              | 2/GC | 11 |
| SC-P (Phosphorus-enriched carbons)                                | 212 | 49* | -   | 0 - 1.3 | 1 A g <sup>-1</sup>   | 1 M H <sub>2</sub> SO <sub>4</sub>                              | 2/GC | 12 |
| chemically modified graphene (CMG)                                | 135 | 19* | -   | 0 - 1   | 10 mA g <sup>-1</sup> | 6 M KOH                                                         | 2/GC | 13 |

a: The numbers 2 and 3 refer to two- and three-electrode tests, respectively.

\*: The value are calculated from the information that given in the reference.

Table S3 Typical results of boron or nitrogen doped nanocarbon materials for supercapacitors in literatures.

| Sample                                                       | Gravimetric capacitance (F g <sup>-1</sup> ) | Interfacial capacitance (μF cm <sup>-2</sup> ) | B content wt % | N content wt % | System voltage(V) | Scan rate              | Electrolyte                        | System <sup>a</sup> | Ref. |
|--------------------------------------------------------------|----------------------------------------------|------------------------------------------------|----------------|----------------|-------------------|------------------------|------------------------------------|---------------------|------|
| our sample (CNB-3)                                           | 247                                          | 66                                             | 0.66           | 0.53           | -1 - 0            | 0.5 A g <sup>-1</sup>  | 6 M KOH                            | 3/GC                | -    |
| boron-doped mesoporous carbon (BMC-ii)                       | 125                                          | 27                                             | 0.16           | -              | -0.8 - 0          | 2.0 mV s <sup>-1</sup> | 6 M KOH                            | 3/CV                | 14   |
| heteroatom-incorporated ordered mesoporous carbon (B0.7-OMC) | 136*                                         | 21                                             | 0.56           | -              | 0 - 0.8           | 0.2 A g <sup>-1</sup>  | 6 M KOH                            | 3/GC                | 5    |
| boron and nitrogen co-doped porous carbon (BNC-9)            | 216                                          | 24                                             | 8.7 at.%       | 7.1            | -0.9 - -0.1       | 0.5 A g <sup>-1</sup>  | 6 M KOH                            | 3/GC                | 15   |
| dual-heteroatom-modified ordered mesoporous carbon (HTBP150) | 177                                          | 30                                             | 1.2            | -              | -1.0 - 0          | 5.0 mV s <sup>-1</sup> | 6 M KOH                            | 3/CV                | 16   |
| nitrogen-containing carbon spheres                           | 159                                          | 11*                                            | -              | 6              | 1.5 - 4           | 0.5 A g <sup>-1</sup>  | 1 M LiPF <sub>6</sub> in EC/DMC    | 3/GC                | 3    |
| N-microporous activated carbon (S-M)                         | 210                                          | 28*                                            | -              | 4              | 0 - 1.0           | 0.5 A g <sup>-1</sup>  | 1 M H <sub>2</sub> SO <sub>4</sub> | 3/GC                | 17   |
| chemical activated glucosamine (CA-GA-2)                     | 220                                          | 38                                             | -              | 4.4            | -0.8 - 0          | 0.1 A g <sup>-1</sup>  | 6 M KOH                            | 3/GC                | 18   |

a: The numbers 2 and 3 refer to two- and three-electrode tests, respectively.

\*: The value are calculated from the information that given in the reference.

## References:

1. H.-J. Liu, W.-J. Cui, L.-H. Jin, C.-X. Wang and Y.-Y. Xia, *J Mater Chem*, 2009, **19**, 3661-3667.
2. K. Xie, X. Qin, X. Wang, Y. Wang, H. Tao, Q. Wu, L. Yang and Z. Hu, *Adv Mater*, 2012, **24**, 347-352.
3. W. R. Li, D. H. Chen, Z. Li, Y. F. Shi, Y. Wan, G. Wang, Z. Y. Jiang and D. Y. Zhao, *Carbon*, 2007, **45**, 1757-1763.
4. H.-J. Liu, X.-M. Wang, W.-J. Cui, Y.-Q. Dou, D.-Y. Zhao and Y.-Y. Xia, *J Mater Chem*, 2010, **20**, 4223-4230.
5. X. C. Zhao, A. Q. Wang, J. W. Yan, G. Q. Sun, L. X. Sun and T. Zhang, *Chem Mater*, 2010, **22**, 5463-5473.
6. Y. Liang, F. Liang, D. Wu, Z. Li, F. Xu and R. Fu, *Phys Chem Chem Phys*, 2011, **13**, 8852-8856.
7. C.-H. Huang, Q. Zhang, T.-C. Chou, C.-M. Chen, D. S. Su and R.-A. Doong, *Chemsuschem*, 2012, **5**, 563-571.
8. D. W. Wang, F. Li, M. Liu, G. Q. Lu and H. M. Cheng, *Angew Chem Int Edit*, 2008, **47**, 373-376.
9. C. Largeot, C. Portet, J. Chmiola, P. L. Taberna, Y. Gogotsi and P. Simon, *J Am Chem Soc*, 2008, **130**, 2730-2731.
10. C. Portet, M. A. Lillo-Rodenas, A. Linares-Solano and Y. Gogotsi, *Phys Chem Chem Phys*, 2009, **11**, 4943-4945.
11. Y. W. Zhu, S. Murali, M. D. Stoller, K. J. Ganesh, W. W. Cai, P. J. Ferreira, A. Pirkle, R. M. Wallace, K. A. Cychosz, M. Thommes, D. Su, E. A. Stach and R. S. Ruoff, *Science*, 2011, **332**, 1537-1541.
12. D. Hulicova-Jurcakova, A. M. Puziy, O. I. Poddubnaya, F. Suarez-Garcia, J. M. D. Tascon and G. Q. Lu, *J Am Chem Soc*, 2009, **131**, 5026-5027.
13. M. D. Stoller, S. Park, Y. Zhu, J. An and R. S. Ruoff, *Nano Lett*, 2008, **8**, 3498-3502.
14. D. W. Wang, F. Li, Z. G. Chen, G. Q. Lu and H. M. Cheng, *Chem Mater*, 2008, **20**, 7195-7200.
15. H. Guo and Q. Gao, *J Power Sources*, 2009, **186**, 551-556.
16. X. Zhao, Q. Zhang, B. Zhang, C.-M. Chen, A. Wang, T. Zhang and D. S. Su, *J Mater Chem*, 2012, **22**, 4963-4969.
17. D. Hulicova-Jurcakova, M. Seredych, G. Q. Lu and T. J. Bandosz, *Adv Funct Mater*, 2009, **19**, 438-447.
18. L. Zhao, L. Z. Fan, M. Q. Zhou, H. Guan, S. Y. Qiao, M. Antonietti and M. M. Titirici, *Adv Mater*, 2010, **22**, 5202-5206.
